# Supplementary material for: NXAl3+ (X = N, P, As): penta-atomic planar tetracoordinate nitrogen with N–X multiple bonding
Source: Royal Society of Chemistry journal article supplement (doi:10.1039/c0cp02475a), 2011-01-01

**$\text{NXAl}_3^+$  (X=N, P, As): Penta-atomic planar tetracoordinate nitrogen with N–X  
multiple bonding**

**Supporting Information.**

Zhong-hua Cui and Yi-hong Ding\*

*State Key Laboratory of Theoretical and Computational Chemistry, Institute of Theoretical  
Chemistry, Jilin University, Changchun 130023, People's Republic of China*

**SI1: Full citations for reference.**

**SI2: The structures of the isomer and transition of  $\text{NXAl}_3^+$  (X=N, P, As).**

**SI3: The details of MD simulations.**

**SI1** Full citations for reference 19.

Frisch MJ, Trucks GW, Schlegel HB, Scuseria GE, Robb MA, Cheeseman JR, Montgomery JA Jr, Vreven T, Kudin KN, Burant JC, Millam JM, Iyengar SS, Tomasi J, Barone V, Mennucci B, Cossi M, Scalmani G, Rega N, Petersson GA, Nakatsuji H, Hada M, Ehara M, Toyota K, Fukuda R, Hasegawa J, Ishida M, Nakajima T, Honda Y, Kitao O, Nakai H, Klene M, Li X, Knox JE, Hratchian HP, Cross JB, Bakken V, Adamo C, Jaramillo J, Gomperts R, Stratmann RE, Yazyev O, Austin AJ, Cammi R, Pomelli C, Ochterski JW, Ayala PY, Morokuma K, Voth GA, Salvador P, Dannenberg JJ, Zakrzewski VG, Dapprich S, Daniels AD, Strain MC, Farkas O, Malick DK, Rabuck AD, Raghava-chari K, Foresman JB, Ortiz JV, Cui Q, Baboul AG, Clifford S, Cioslowski J, Stefanov BB, Liu G, Liashenko A, Piskorz P, Komaromi I, Martin RL, Fox DJ, Keith T, Al-Laham MA, Peng CY, Nanayakkara A, Challacombe M, Gill PMW, Johnson B, Chen W, Wong MW, Gonzalez C, Pople JA, *Gaussian 03, Revision D.02*. Gaussian Inc., Wallingford CT, 2004.

Frisch MJ, Trucks GW, Schlegel HB, Scuseria GE, Robb MA, Cheeseman JR, Scalmani G, Barone V, Mennucci B, Petersson GA, Nakatsuji H, Caricato M, Li X, Hratchian HP, Izmaylov AF, Bloino J, Zheng G, Sonnenberg JL, Hada M, Ehara M, Toyota K, Fukuda R, Hasegawa J, Ishida M, Nakajima T, Honda Y, Kitao O, Nakai H, Vreven T, Montgomery JA, Peralta JE Jr, Ogliaro F, Bearpark M, Heyd JJ, Brothers E, Kudin KN, Staroverov VN, Kobayashi R, Normand J, Raghavachari K, Rendell A, Burant JC, Iyengar SS, Tomasi J, Cossi M, Rega N, Millam JM, Klene M, Knox JE, Cross JB, Bakken V, Adamo C, Jaramillo J, Gomperts R, Stratmann RE, Yazyev O, Austin AJ, Cammi R, Pomelli C, Ochterski JW, Martin RL, Morokuma K, Zakrzewski

VG, Voth GA, Salvador P, Dannenberg JJ, Dapprich S, Daniels AD, Farkas O,  
Foresman JB, Ortiz JV, Cioslowski J, and Fox DJ, *Gaussian 09, Revision A.01*.  
Gaussian, Inc., Wallingford CT, 2009.

**SI2-1** Optimized geometries of interconversion transition states of  $\text{N}_2\text{Al}_3^+$ ,  $\text{NPAI}_3^+$  and  $\text{NAsAl}_3^+$  at the B3LYP/aug-cc-pVTZ level, respectively.

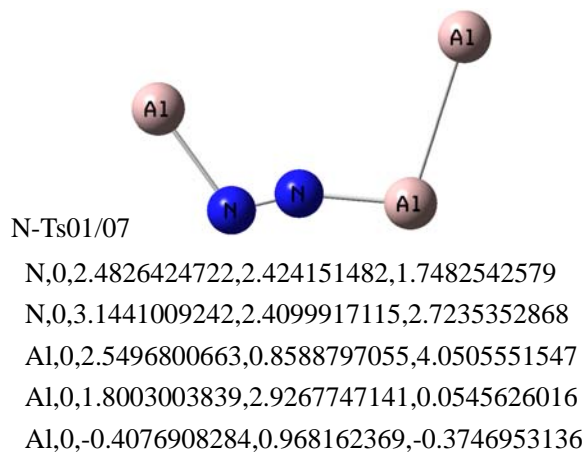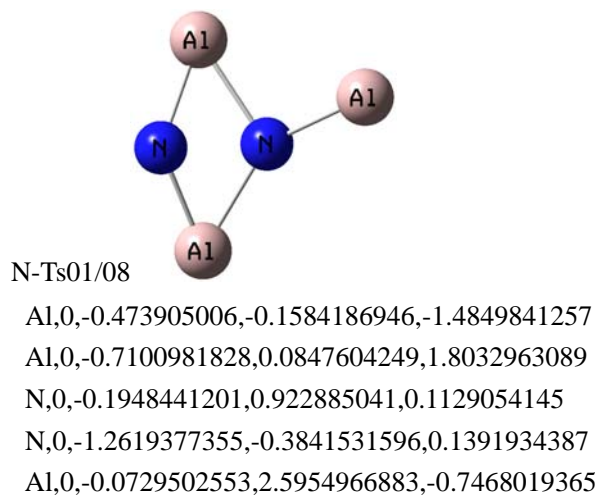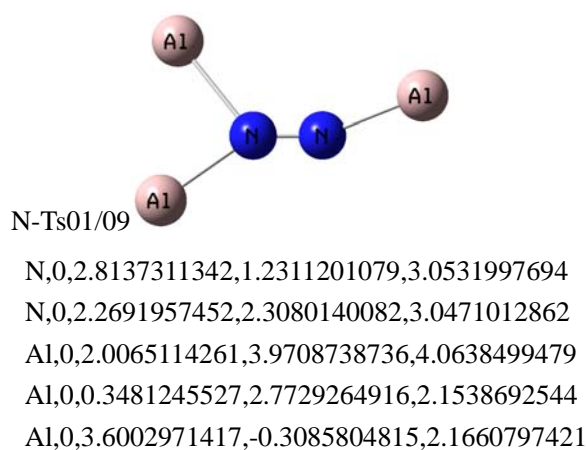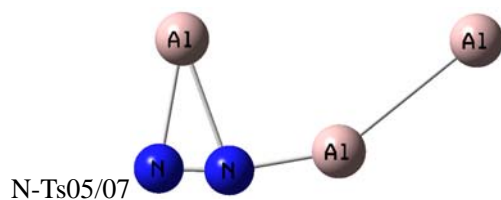

Al,0,-0.3005978429,-0.590543056,-1.6630827809  
Al,0,-0.6550458006,1.3121836721,0.9079703572  
N,0,-1.4004955355,-0.296254385,0.3696995775  
N,0,-1.7368824555,-1.2913272535,-0.1585532948  
Al,0,1.1687866395,3.5845113735,0.4625742412

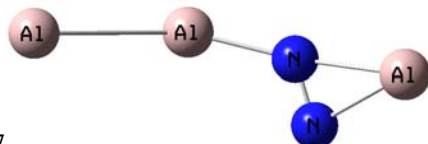

N-Ts06/07

N,0,1.6871953561,0.8659542287,1.5409058408  
N,0,2.3227315129,-0.1739053561,1.4818746288  
Al,0,4.4483326965,4.7427241,0.7408484359  
Al,0,2.5926654805,2.5199116808,2.0657203301  
Al,0,0.6074769539,-0.5855796534,0.3201977645

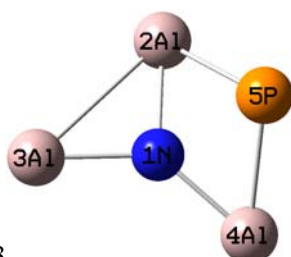

P-Ts01/03

Al,0,0.3649832781,1.6056173858,-0.026454288  
Al,0,-0.603977094,0.3460874903,-2.4180456932  
Al,0,0.2153364086,-1.808203866,0.2850054989  
N,0,-0.1201724192,-0.1753082611,-0.6343971787  
P,0,-0.7546973735,0.031879121,1.301075791

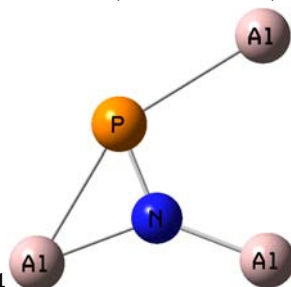

P-Ts01/04

Al,0,2.5053342056,-0.8709166801,0.  
Al,0,-2.5077299471,0.4526340028,0.  
Al,0,0.7380384649,2.296546647,0.  
N,0,-0.4623897542,0.8020982881,0.  
P,0,-0.2257838993,-0.8105928477,0.

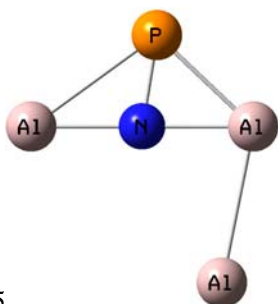

P-Ts01/05

Al,0,-1.7759440297,-1.5580949503,0.  
Al,0,-0.7007233797,2.6928666325,0.  
P,0,0.9993490297,-1.5425858003,0.  
N,0,-0.1861471246,-0.3879934194,0.  
Al,0,1.4058179943,0.7900460475,0.

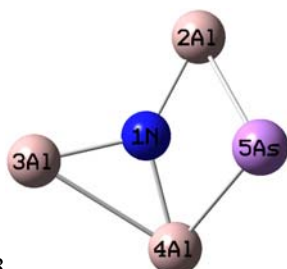

As-Ts01/03

Al,0,0.1261919213,1.850755097,0.0333741811  
Al,0,-1.7530305296,-0.270659833,-2.0317169647  
Al,0,0.0245743464,-1.6897694856,-0.3550227667  
N,0,-0.5434620662,0.1757434283,-0.5794974156  
As,0,-0.2921025519,-0.0719611167,1.507418896

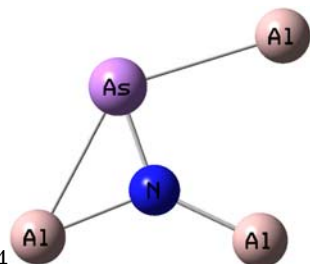

As-Ts01/04

Al,0,2.4943693614,-0.6529552261,0.  
Al,0,-2.4800893558,0.6241376231,0.  
Al,0,0.7570937594,2.2035817925,0.  
N,0,-0.4474740059,0.7344008194,0.  
As,0,-0.2764306892,-1.0393955989,0.

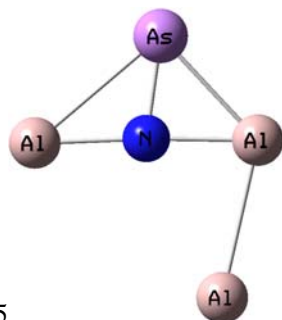

As-Ts01/05

N,0,-0.3357606078,-0.4925751295,0.

Al,0,0.9812504646,0.9321518082,0.

As,0,1.1356035244,-1.5517826183,0.

Al,0,-1.7308615383,-1.841557424,0.

Al,0,-1.4456598429,2.3863093635,0.

The figure means a fixed bond angle scanning between **N-03** and **N-05**, **N-04** and **N-05** isomers at the B3LYP/6-311+G(d) level.

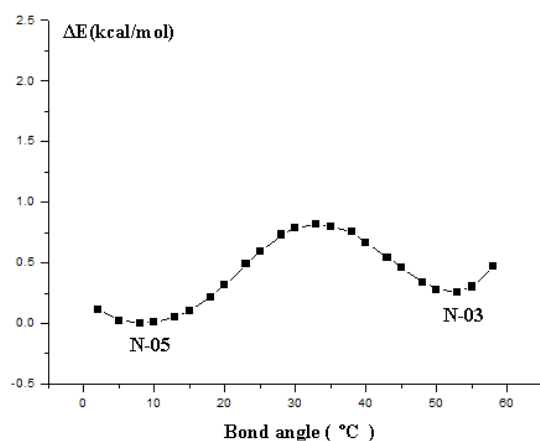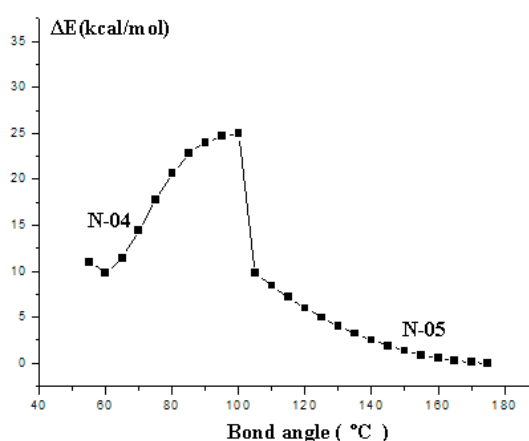

**SI2-2** Calculated structures for the isomer of the  $\text{N}_2\text{Al}_3^+$ ,  $\text{NPAI}_3^+$  and  $\text{NAsAl}_3^+$  in both the singlet and triplet electronic states at the B3LYP/6-311+G(d) level, respectively.

**SI2-2-1:**  $\text{N}_2\text{Al}_3^+$

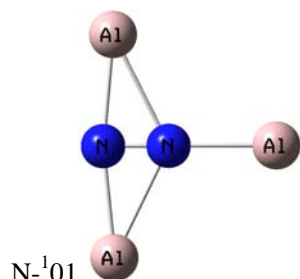

N-<sup>1</sup>01

Al,0,0.,-2.1273061328,-0.7476192599

Al,0,0.,0.,2.3572303843

Al,0,0.,2.1273061328,-0.7476192599

N,0,0.,0.,0.3229678281

N,0,0.,0.,-0.9115289327

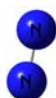

N-<sup>1</sup>03

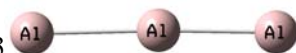

N,0,2.3352726365,-0.4471776948,0.

Al,0,-4.2854544343,-1.0197118553,0.

Al,0,-1.6320528523,0.5866161246,0.

N,0,3.0871135597,-1.2445173521,0.

Al,0,0.9482023504,2.2732287277,0.

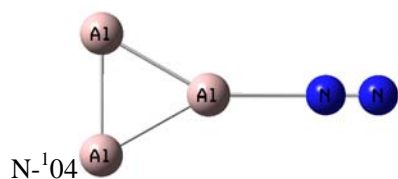

N-<sup>1</sup>04

Al,0,0.,1.2683769906,2.4720892331

Al,0,0.,0.,0.2400273717

N,0,0.,0.,-2.2022807234

N,0,0.,0.,-3.2985567445

Al,0,0.,-1.2683769906,2.4720892331

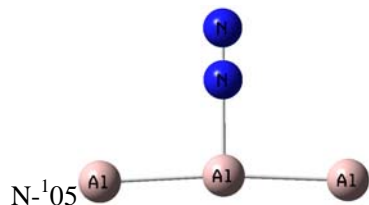

N-<sup>1</sup>05

Al,0,-0.7064838378,3.0888730966,0.



Al,0,2.9798109875,-1.8271456036,0.  
N,0,-2.0316496734,-1.7438083913,0.  
Al,0,1.0622772959,0.5750654763,0.  
N,0,-1.1535601722,-1.086277108,0.

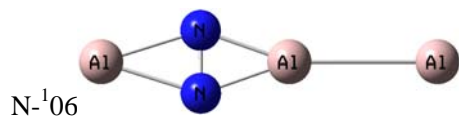

Al,0,0.3958035238,-3.0054124672,0.  
Al,0,-0.6685484979,3.8286999001,0.  
N,0,0.7080933871,-0.8804034635,0.  
N,0,-0.5478795509,-1.0759862025,0.  
Al,0,-0.2004128622,0.8232412331,0.

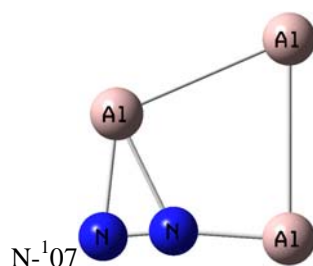

Al,0,-0.3241236059,-1.5394405348,0.  
Al,0,0.3992655614,1.974711258,0.  
N,0,-0.9499393051,0.5670225767,0.  
N,0,-1.8887962835,-0.1647042009,0.  
Al,0,2.6781102831,-0.5166619189,0.

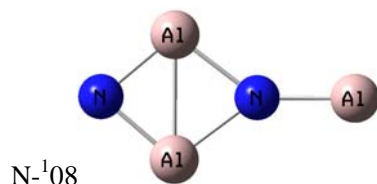

Al,0,1.155319259,0.,0.8867669841  
Al,0,0.,0.,-2.4165146286  
N,0,0.,0.,-0.6241668983  
N,0,0.,0.,2.2352244989  
Al,0,-1.155319259,0.,0.8867669841

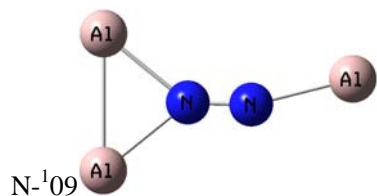

Al,0,2.0619708539,0.9194893397,0.  
N,0,0.0931313029,0.3179609393,0.  
Al,0,-1.2736424143,-2.5252813472,0.  
N,0,-0.6062892322,-0.6576888568,0.

Al,0,-0.0845108303,2.361781875,0.

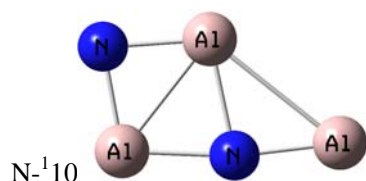

Al,0,0.,1.068707444,-0.514784169

Al,0,0.,0.4429343643,2.1662181035

N,0,0.,-0.4993933724,0.6882703324

N,0,0.,0.1957402362,-2.0486032272

Al,0,0.,-1.2349766722,-1.0144780395

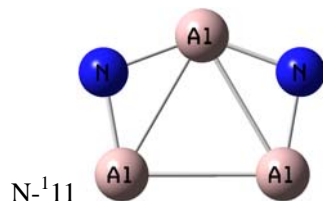

Al,0,0.,0.,1.326431602

Al,0,0.,1.3416820054,-0.9818105579

Al,0,0.,-1.3416820054,-0.9818105579

N,0,0.,1.6421877494,0.7198575868

N,0,0.,-1.6421877494,0.7198575868

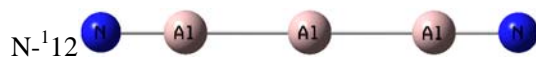

N,0,0.,0.,-4.9206561774

Al,0,0.,0.,-3.165345359

Al,0,0.,0.,-0.5861117375

Al,0,0.,0.,1.9930648905

N,0,0.,0.,3.7483340334

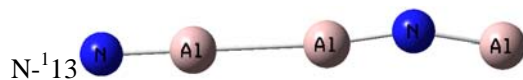

N,0,4.4348067781,0.0811390247,0.

Al,0,2.6698465219,0.0714912172,0.

Al,0,0.0961327291,0.0619292524,0.

N,0,-1.5797281996,-0.1251070754,0.

Al,0,-3.2817058195,0.2342124912,0.

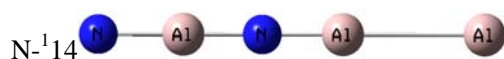

Al,0,0.,0.,4.6386922417

Al,0,0.,0.,1.5941430001

N,0,0.,0.,-0.138927915

N,0,0.,0.,-3.6575590664

Al,0,0.,0.,-1.8332226604

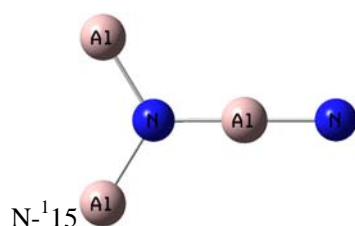

Al,0,0.,0.,0.921907027  
Al,0,0.,-1.6182724476,-1.8403541355  
N,0,0.,0.,-0.8528357102  
N,0,0.,0.,2.7098750043  
Al,0,0.,1.6182724476,-1.8403541355

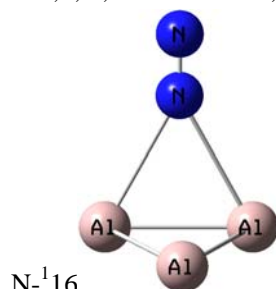

N,0,1.1729602319,2.1892400407,0.  
Al,0,-2.7857299385,-0.2436327894,0.  
Al,0,0.2628451223,-1.1622716491,-1.2787790516  
N,0,0.8457749462,1.1370679301,0.  
Al,0,0.2628451223,-1.1622716491,1.2787790516

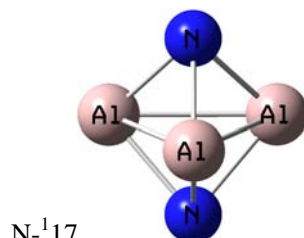

Al,0,-0.0000000024,1.40368824,0.  
Al,0,1.215629676,-0.7018441179,0.  
N,0,0.,0.,-1.31899443  
Al,0,-1.2156296736,-0.7018441221,0.  
N,0,0.,0.,1.31899443

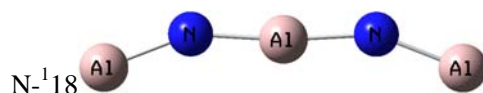

Al,0,0.,3.3077305816,-0.2324963241  
N,0,0.,-1.711601405,0.3904986406  
Al,0,0.,-3.3077305816,-0.2324963241  
N,0,0.,1.711601405,0.3904986406  
Al,0,0.,0.,0.2937933668

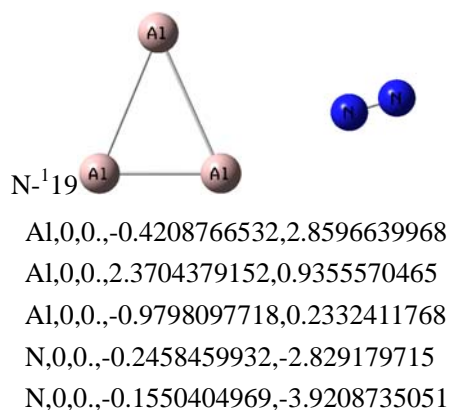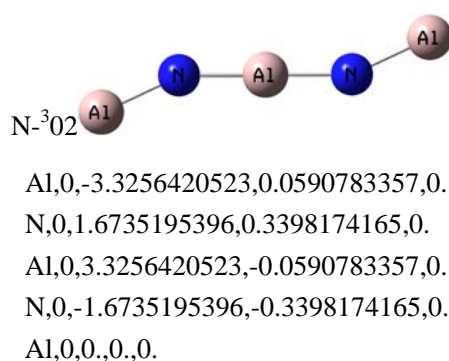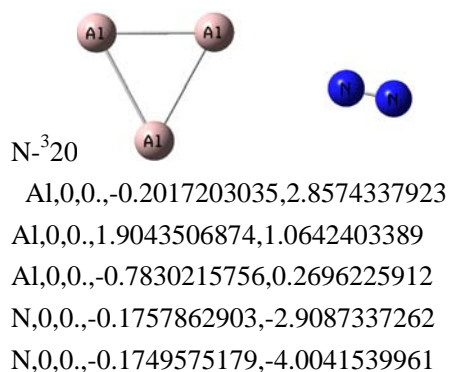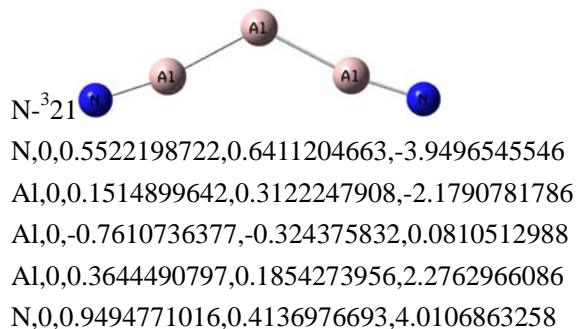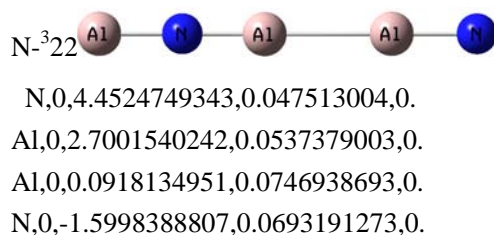

Al,0,-3.3052515628,0.078401009,0.

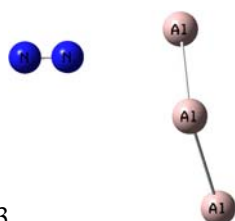

N-<sup>3</sup>23

N,0,0.1676077139,-2.6308552599,0.0307594325

Al,0,-1.9976963979,2.6574732189,0.4527302771

Al,0,0.0140885421,1.0776363012,-0.9141578238

N,0,-0.3036905752,-3.6168602886,-0.0497407493

Al,0,2.0662797171,-0.3780779716,0.4825268634

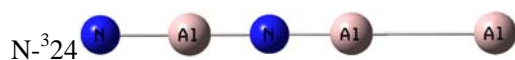

N-<sup>3</sup>24

Al,0,0.,0.,4.6197038202

Al,0,0.,0.,1.595955876

N,0,0.,0.,-0.1264558123

N,0,0.,0.,-3.680006157

Al,0,0.,0.,-1.8060721269

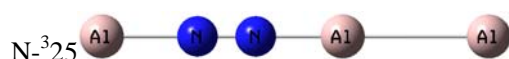

N-<sup>3</sup>25

Al,0,0.0540240665,3.8358096536,0.

Al,0,-0.0343696053,-4.0984292654,0.

N,0,0.,0.675435167,0.

N,0,0.0145705438,1.8693950131,0.

Al,0,-0.0275001387,-1.1076735621,0.

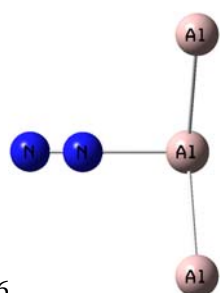

N-<sup>3</sup>26

Al,0,2.6052278206,-0.9558073385,-0.31371328

Al,0,-2.6062476365,-0.9565666765,-0.3138267704

N,0,0.0020368065,2.7364039719,-0.0973790828

Al,0,-0.0009266692,-0.482958194,0.6597164808

N,0,0.0003256787,1.6417822371,0.0560736523

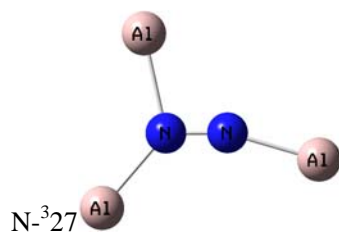

N-<sup>3</sup>27

Al,0,-1.7906239272,-1.9443263197,0.  
Al,0,-0.4050367187,2.3662813563,0.  
N,0,0.3495424031,0.4411771563,0.  
N,0,-0.5568731277,-0.4305718023,0.  
Al,0,2.3175080205,-0.1116332106,0.

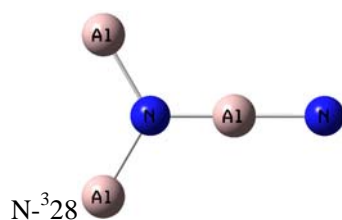

Al,0,0.,0.,0.8760890757  
Al,0,0.,-1.6762761116,-1.8334635666  
N,0,0.,0.,-0.8601566321  
N,0,0.,0.,2.7492327396  
Al,0,0.,1.6762761116,-1.8334635666

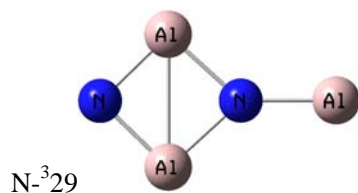

Al,0,1.2646520961,0.,0.8529357045  
Al,0,0.,0.,-2.3509695331  
N,0,0.,0.,-0.5280130277  
N,0,0.,0.,2.141188092  
Al,0,-1.2646520961,0.,0.8529357045

**SI2-2-2:  $\text{NPAl}_3^+$**

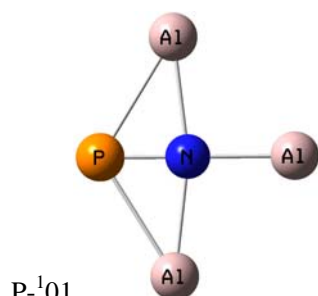

P-<sup>1</sup>01

Al,0,0.,-2.2411906545,-0.1770385418

Al,0,0.,0.,2.0702507879

Al,0,0.,2.2411906545,-0.1770385418

N,0,0.,0.,0.0878611531

P,0,0.,0.,-1.5306040973

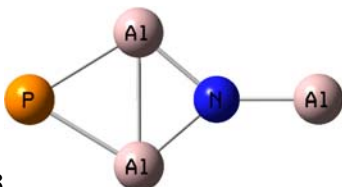

P-<sup>1</sup>03

Al,0,-0.0306709303,0.3749968304,-1.1980997027

Al,0,-0.0053820298,-2.8763879695,0.

N,0,-0.0558071021,-1.0334393313,0.

P,0,0.0020200124,2.3280698599,0.

Al,0,-0.0306709303,0.3749968304,1.1980997027

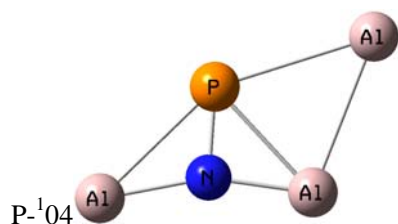

P-<sup>1</sup>04

N,0,0.9480162721,0.3239892056,0.

Al,0,-2.9163634497,-0.3997836705,0.

Al,0,-0.5737052408,1.4990342779,0.

Al,0,2.922442216,-0.0318986679,0.

P,0,0.0403608124,-1.0431980352,0.

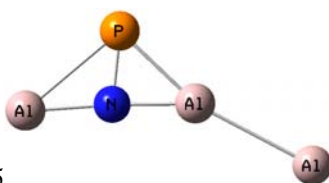

P-<sup>1</sup>05

Al,0,-0.6603378782,-2.884385537,0.

Al,0,-1.2311030442,3.5848613681,0.

P,0,1.6031919852,-0.8830908135,0.

N,0,-0.063545788,-1.0104603287,0.

Al,0,0.0388507252,0.8832143111,0.

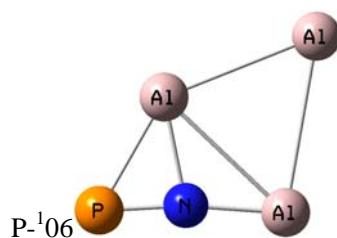

Al,0,-0.1251573464,-1.2896246157,0.

Al,0,0.4680636284,1.8185202649,0.

N,0,-0.9362637167,0.5932570972,0.

P,0,-2.3016153176,-0.2567913891,0.

Al,0,2.8094894023,-0.5444341773,0.

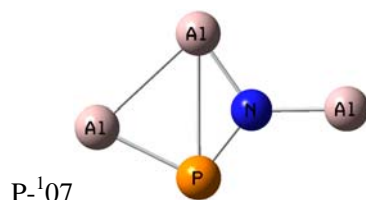

Al,0,1.6363284712,-0.157548621,0.

N,0,-0.0002558864,0.7451928281,0.

Al,0,-0.0314072309,-2.3644096686,0.

P,0,-1.2436088026,-0.4500023708,0.

Al,0,-0.1703968714,2.6430297824,0.

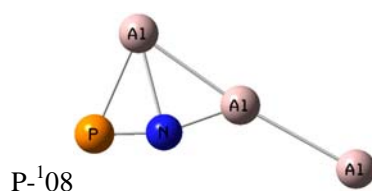

N,0,-0.0010293812,0.8917135741,0.

Al,0,2.8191773414,-2.5064291632,0.

Al,0,0.2822835128,-0.9170145531,0.

Al,0,-2.2598025154,0.3106767469,0.

P,0,-0.7232369576,2.2917753953,0.

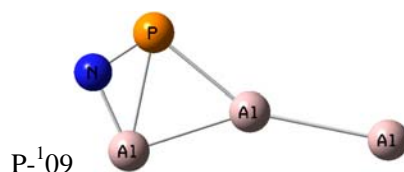

Al,0,-0.0246722966,3.9236193469,0.

Al,0,1.4285670664,-1.5347672553,0.

N,0,-0.0728185645,-2.6647943534,0.

Al,0,0.0264713088,0.8500901945,0.

P,0,-1.2071529141,-1.5674404627,0.



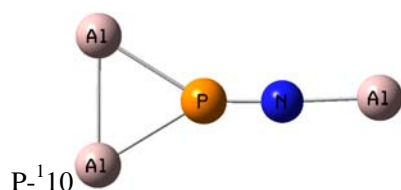

P-10

Al,0,0.,1.278666,2.078348

N,0,0.,-0.037572,-1.502366

Al,0,0.,-1.264908,2.103748

Al,0,0.,0.02593,-3.409862

P,0,0.,-0.017463,0.031834

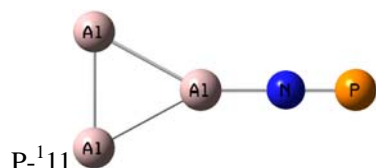

P-11

Al,0,0.,1.2578234072,2.3521129662

Al,0,0.,0.,0.0548440761

N,0,0.,0.,-1.7842297061

P,0,0.,0.,-3.2914719326

Al,0,0.,-1.2578234072,2.3521129662

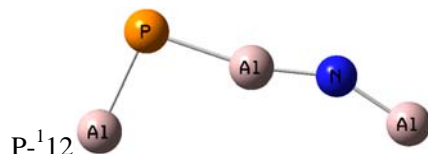

P-12

Al,0,-0.2626900126,-0.3965675595,0.

N,0,-1.9717023861,-0.3864351628,0.

Al,0,-3.4997181323,0.427474735,0.

P,0,1.893968183,-0.9131686035,0.

Al,0,2.6312595981,1.1888043008,0.

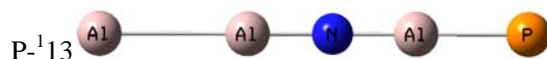

P-13

Al,0,0.,0.,4.6903806932

Al,0,0.,0.,1.6867759267

N,0,0.,0.,-0.0352798024

P,0,0.,0.,-4.0078389801

Al,0,0.,0.,-1.7309122374

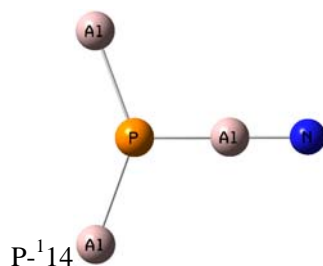

P-14

Al,0,0.,2.4603717577,1.4383139148

Al,0,0.,-2.4603717577,1.4383139148

N,0,0.,0.,-3.4451063414

Al,0,0.,0.,-1.6502202444

P,0,0.,0.,0.5419771463

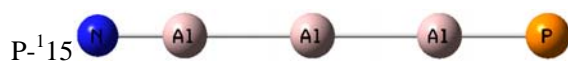

N,0,0.,0.,-4.9845640091

Al,0,0.,0.,-3.2326112783

Al,0,0.,0.,-0.6682247639

Al,0,0.,0.,1.8862622249

P,0,0.,0.,4.0684234764

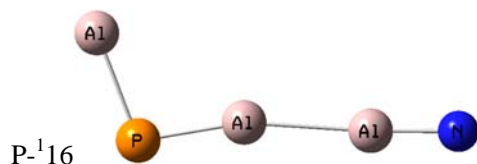

N,0,4.4387482003,0.3802366864,0.

Al,0,2.6963443704,0.0775226917,0.

Al,0,0.1588595542,-0.2112167814,0.

P,0,-1.875120606,-0.9488348488,0.

Al,0,-3.0794795089,1.0259571621,0.

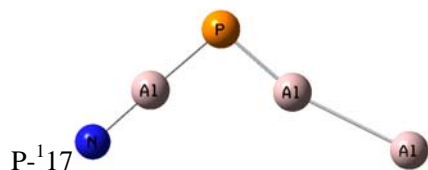

N,0,3.3651078739,-1.6888498169,0.

Al,0,2.2342211526,-0.2716126715,0.

Al,0,-3.9589066533,-0.6665632237,0.

P,0,0.8394521302,1.4070459152,0.

Al,0,-1.0445482233,0.2290447869,0.

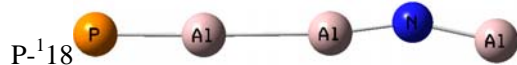

Al,0,-1.7594489538,0.0138519308,0.

Al,0,0.8065499885,-0.0310604769,0.

N,0,2.4775746687,-0.2655669865,0.

P,0,-3.9582058487,0.0128029642,0.

Al,0,4.1843144752,0.0981349984,0.

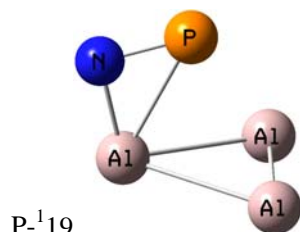

N,0,-0.292971482,2.0412615912,0.

Al,0,-1.3390077744,0.4971493299,0.  
Al,0,0.1646817792,-1.5063344601,-1.2904829272  
P,0,1.0651468895,1.2351089854,0.  
Al,0,0.1646817792,-1.5063344601,1.2904829272

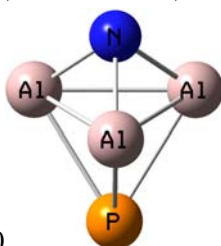

P-<sup>1</sup>20

Al,0,0.0000000025,1.4770225636,-0.3371753248  
Al,0,1.2791390608,-0.7385112839,-0.3371753248  
N,0,0.,0.,-1.518586184  
Al,0,-1.2791390633,-0.7385112796,-0.3371753248  
P,0,0.,0.,1.6015023604

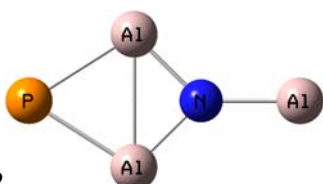

P-<sup>3</sup>02

Al,0,1.2923485922,0.,0.3295086435  
Al,0,0.,0.,-2.8688430494  
N,0,0.,0.,-0.9579268018  
P,0,0.,0.,2.3326095542  
Al,0,-1.2923485922,0.,0.3295086435

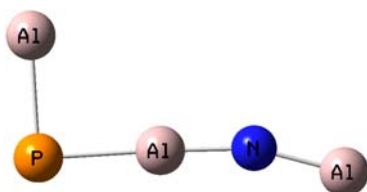

P-<sup>3</sup>21

Al,0,-1.35215413,-2.4624832534,-0.0167684141  
N,0,1.5891147762,0.9605050537,-0.0703756217  
Al,0,2.9433003596,1.9822503254,-0.0917561702  
P,0,-2.1043016137,-0.3604762722,-0.0043098249  
Al,0,-0.016586272,0.3862058765,-0.0413894291

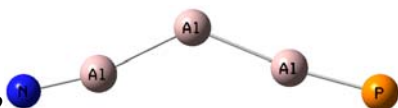

P-<sup>3</sup>22

N,0,-0.3892269894,-0.66556622,-4.7218654388  
Al,0,-0.1498646964,-0.2563282986,-2.939916172  
Al,0,0.4448974737,0.7614672322,-0.7213729653  
Al,0,-0.004432331,-0.0043319552,1.6355091022

P,0,-0.2665015169,-0.4532366185,3.835069034

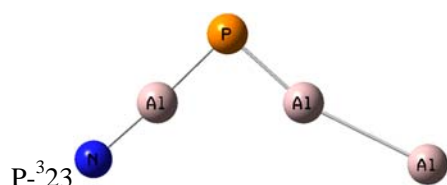

N,0,3.3605994191,-1.711415829,0.

Al,0,2.161959992,-0.2707576658,0.

Al,0,-3.9321917028,-0.6868550195,0.

P,0,0.8655588649,1.4531732155,0.

Al,0,-1.0206002932,0.2249202888,0.

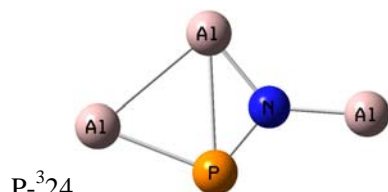

N,0,0.8125705199,0.1736123555,0.

Al,0,-2.5420425774,-0.3793866056,0.

Al,0,-0.4355342425,1.5895503141,0.

Al,0,2.7670018009,0.1510915312,0.

P,0,-0.1812448908,-1.1867244851,0.

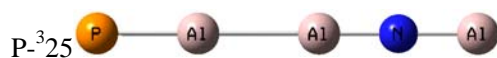

Al,0,-1.7855340264,-0.0192885263,0.

Al,0,0.7965133349,-0.0371779229,0.

N,0,2.4924372762,-0.0493386645,0.

P,0,-3.9450565925,-0.0045324941,0.

Al,0,4.1924243378,-0.0614999622,0.

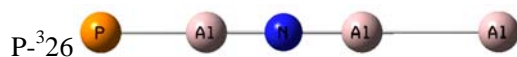

Al,0,0.,0.,4.6865039012

Al,0,0.,0.,1.690042725

N,0,0.,0.,-0.027757279

P,0,0.,0.,-4.0294889215

Al,0,0.,0.,-1.7161748256

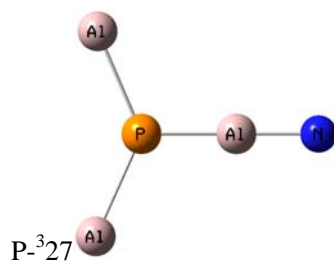

Al,0,0.,2.32917343,1.5125869765

Al,0,0.,-2.32917343,1.5125869765

N,0,0.,0.,-3.5330111927

Al,0,0.,0.,-1.6638359666

P,0,0.,0.,0.4949515963

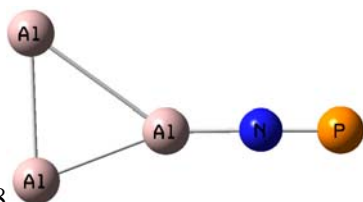

P-<sup>3</sup>28

Al,0,0.0483749803,1.5761068708,-2.6636185113

Al,0,0.0029500002,-0.0982013538,0.044932496

N,0,0.0011433424,0.057347384,1.8472620446

P,0,-0.0009476626,0.1647497251,3.3662146814

Al,0,0.0138407596,-1.2304887761,-2.3475189206

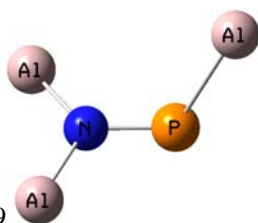

P-<sup>3</sup>29

Al,0,2.4413741809,1.5118802922,-0.2462369202

N,0,-0.5307669992,-0.4749123453,0.1699506321

Al,0,-2.1790629792,0.4166899314,-0.4181680925

Al,0,-0.240932149,-2.4062523043,-0.0390745232

P,0,0.5369126964,0.3839133061,1.1079019638

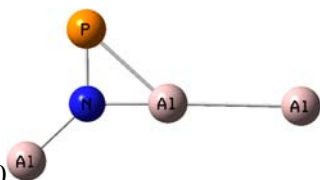

P-<sup>3</sup>30

Al,0,-0.8191464666,-2.7644790619,0.

Al,0,-1.1172636118,3.6067788464,0.

P,0,1.8084119657,-0.7273856575,0.

N,0,0.1342407612,-1.1029641381,0.

Al,0,-0.3191866485,0.678189011,0.

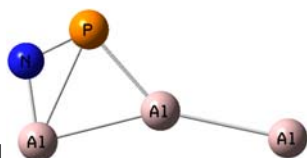

P-<sup>3</sup>31

Al,0,-0.161532449,3.7029896694,0.

Al,0,1.5546878243,-1.6817882671,0.

N,0,-0.1162677967,-2.4677271665,0.

Al,0,0.0809621899,0.7667050239,0.

P,0,-1.2074551685,-1.3134717898,0.

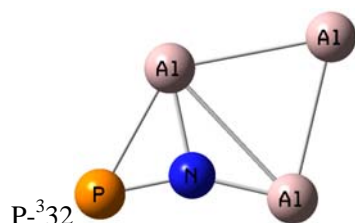

P-<sup>32</sup>

Al,0,-0.1068577424,-1.4006539092,0.

Al,0,0.5276823562,1.7302495572,0.

N,0,-0.7677139334,0.4331709399,0.

P,0,-2.3466598828,-0.0945906521,0.

Al,0,2.6080658523,-0.3472487558,0.

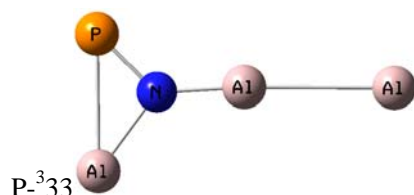

P-<sup>33</sup>

N,0,-0.5335542017,0.6499241041,0.

Al,0,2.9179295672,-2.7526030569,0.

Al,0,0.7877965277,-0.5517262384,0.

Al,0,-2.5148626926,0.3715057119,0.

P,0,-0.5399172006,2.3536214794,0.

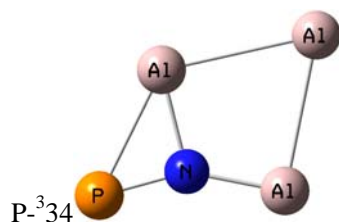

P-<sup>34</sup>

N,0,-0.4816994193,0.8237776064,-0.271457917

Al,0,0.6923487312,1.6511310356,0.8677805908

Al,0,1.8466811463,-0.9643476918,1.5690929522

P,0,-1.7295191196,0.814894999,-1.3748155628

Al,0,-0.3216221586,-1.1151107891,-0.3690433933

**SI2-2-3: NAsAl<sub>3</sub><sup>+</sup>**

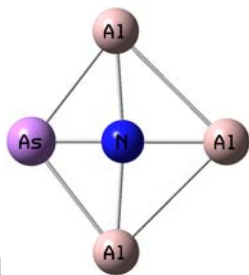

As-<sup>1</sup>01

Al,0,0.,-2.1718648389,-0.0797519279  
Al,0,0.,0.,2.0758188147  
Al,0,0.,2.1718648389,-0.0797519279  
N,0,0.,0.,0.0662578978  
As,0,0.,0.,-1.7091420967

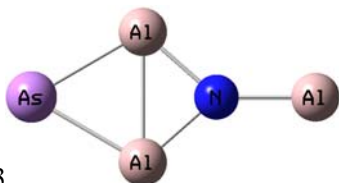

As-<sup>1</sup>03

Al,0,-0.055167074,0.3392310084,-1.222185017  
Al,0,0.0502369652,-2.8877476897,0.  
N,0,-0.1228960436,-1.0358070272,0.  
As,0,0.0624822469,2.4133289202,0.  
Al,0,-0.055167074,0.3392310084,1.222185017

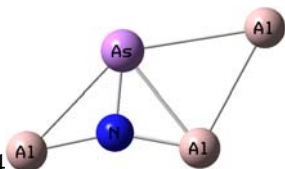

As-<sup>1</sup>04

N,0,0.971253167,0.3534496178,0.  
Al,0,-2.963319751,-0.3250904711,0.  
Al,0,-0.5635122881,1.4648826974,0.  
Al,0,2.9273041746,0.0425549026,0.  
As,0,0.0490253074,-1.1876536367,0.

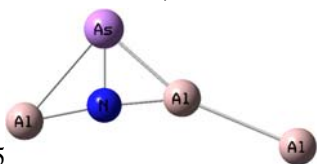

As-<sup>1</sup>05

Al,0,-0.6042763615,-2.8708248688,0.  
Al,0,-1.2286105722,3.6159993887,0.  
As,0,1.6747693959,-0.9639400199,0.  
N,0,-0.1567820461,-0.9776203155,0.  
Al,0,0.001955584,0.8865248156,0.

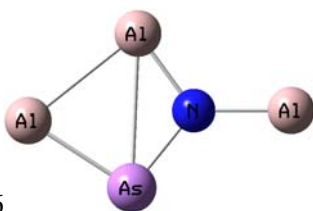

As-<sup>106</sup>

Al,0,1.5898672936,-0.1725984625,0.  
N,0,0.0317807245,0.7958203027,0.  
Al,0,0.0566968588,-2.3760123843,0.  
As,0,-1.3756805028,-0.5016666157,0.  
Al,0,-0.1120046941,2.6707191098,0.

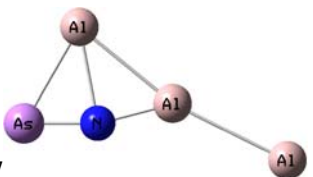

As-<sup>107</sup>

N,0,-0.0270882416,0.898324206,0.  
Al,0,2.7984771907,-2.6290276216,0.  
Al,0,0.3783544997,-0.8638780161,0.  
Al,0,-2.2112653592,0.238986962,0.  
As,0,-0.8210860895,2.4263164696,0.

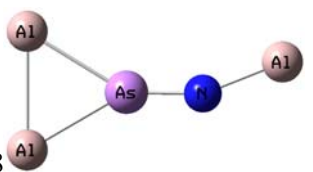

As-<sup>108</sup>

Al,0,0.,1.2233641885,2.272354875  
N,0,0.,0.2989671354,-1.6630537165  
Al,0,0.,-1.3637822422,2.0601390341  
Al,0,0.,-0.251017981,-3.4572540434  
As,0,0.,0.1374488993,0.002729851

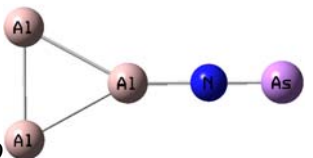

As-<sup>109</sup>

Al,0,0.,1.258692049,2.3790069156  
Al,0,0.,0.,0.0652321316  
N,0,0.,0.,-1.7500808425  
As,0,0.,0.,-3.3897967503  
Al,0,0.,-1.258692049,2.3790069156

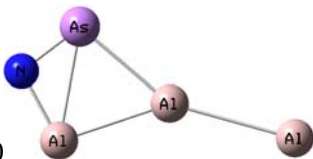

As-<sup>110</sup>



Al,0,0.0591394542,3.9217409676,0.  
Al,0,1.4112169715,-1.4630472266,0.  
N,0,0.0315516882,-2.7054835421,0.  
Al,0,-0.0457894695,0.8651774892,0.  
As,0,-1.3057240444,-1.6116802181,0.

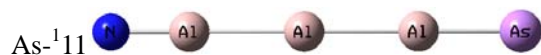

N,0,0.,0.,-5.0019382835  
Al,0,0.,0.,-3.2514084532  
Al,0,0.,0.,-0.6898951902  
Al,0,0.,0.,1.8645632797  
As,0,0.,0.,4.1479642971

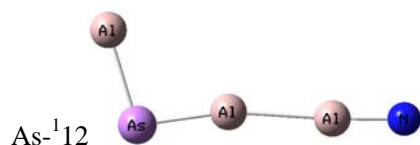

N,0,4.4608630162,0.4215902904,0.  
Al,0,2.7254152656,0.0803851778,0.  
Al,0,0.1929710254,-0.266872946,0.  
As,0,-1.9401474483,-1.0259227633,0.  
Al,0,-3.0997498488,1.1144851511,0.

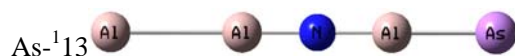

Al,0,0.,0.,4.7033955676  
Al,0,0.,0.,1.708323355  
N,0,0.,0.,-0.0119532538  
As,0,0.,0.,-4.0879294676  
Al,0,0.,0.,-1.7087106012

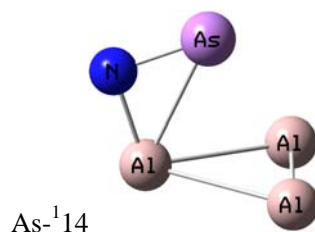

N,0,-0.3631013453,2.0686596492,0.  
Al,0,-1.3430514832,0.5040850425,0.  
Al,0,0.1572030087,-1.5204940948,-1.2877869185  
As,0,1.1504422911,1.2263753778,0.  
Al,0,0.1572030087,-1.5204940948,1.2877869185

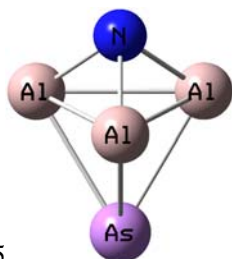

As-<sup>15</sup>

Al,0,0.0000000025,1.4951681022,-0.3706197469  
Al,0,1.2948535582,-0.7475840533,-0.3706197469  
N,0,0,0,-1.5218061491  
Al,0,-1.2948535607,-0.7475840489,-0.3706197469  
As,0,0,0,1.7052687595

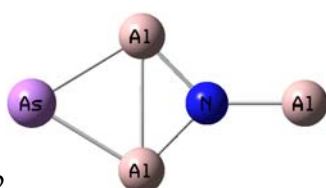

As-<sup>302</sup>

Al,0,1.310396249,0,-0.2623730707  
Al,0,0,0,-3.4402631522  
N,0,0,0,-1.5294251848  
As,0,0,0,1.8635002283  
Al,0,-1.310396249,0,-0.2623730707

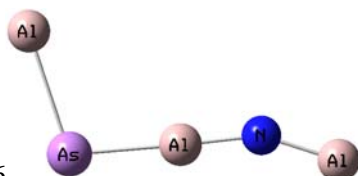

As-<sup>316</sup>

Al,0,0.5486088143,-0.6929972887,3.3069876177  
N,0,0.3461084908,-0.4372008605,-2.0393126311  
Al,0,0.3991442683,-0.5041951359,-3.7466082159  
As,0,-0.7665615989,0.9683131145,1.590531144  
Al,0,-0.1394446046,0.1761450607,-0.5186115147

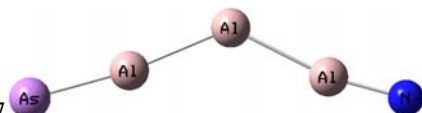

As-<sup>317</sup>

N,0,0.7506107294,0.1734875247,-5.6633047984  
Al,0,0.2426119186,0.0469119572,-3.9002381132  
Al,0,-0.8954580081,-0.2260446227,-1.6838324123  
Al,0,-0.0000802906,-0.0047999712,0.6645974406  
As,0,0.5572138507,0.136308602,2.9585657833

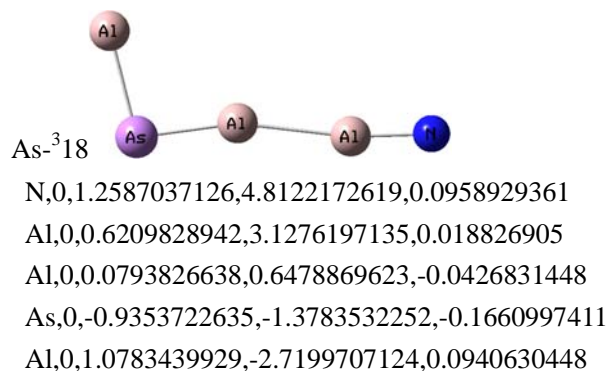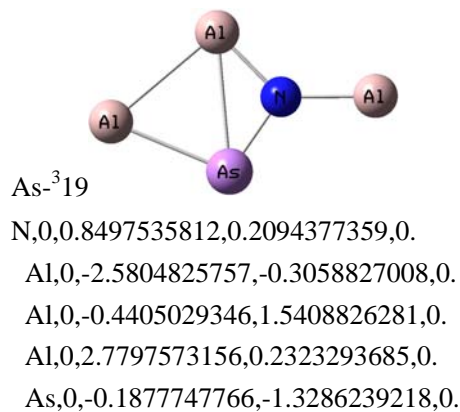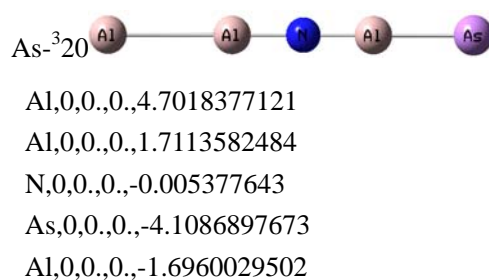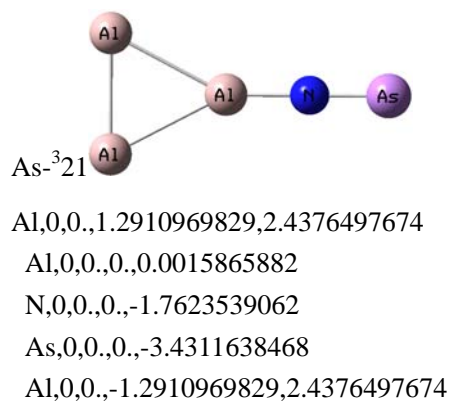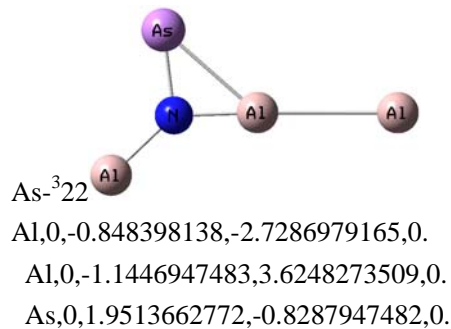

N,0,0.0749079462,-1.0678034409,0.

Al,0,-0.3461253371,0.6906077546,0.

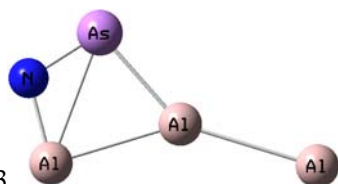

As-<sup>3</sup>23

Al,0,-0.0401188757,3.7234913413,0.

Al,0,1.5478017311,-1.5561082033,0.

N,0,0.0013987035,-2.5212653379,0.

Al,0,-0.0226974679,0.7558676375,0.

As,0,-1.335989491,-1.3952779676,0.

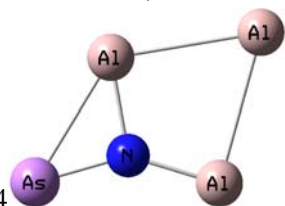

As-<sup>3</sup>24

N,0,-0.4471775345,0.7665123833,-0.2478157704

Al,0,0.6929877117,1.6483153611,0.8686642654

Al,0,1.8812723029,-0.9763851924,1.5971470615

As,0,-1.8360238974,0.8867218974,-1.4611478137

Al,0,-0.2848694028,-1.1148192893,-0.3352910728

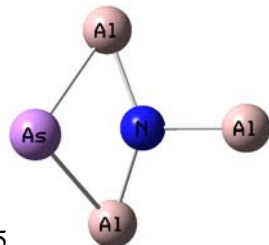

As-<sup>3</sup>25

Al,0,0.5529003416,1.7907649585,-0.1440531178

Al,0,-0.5166447443,0.,-2.6482432234

Al,0,0.5529003416,-1.7907649585,-0.1440531178

N,0,0.1229776488,0.,-0.7708446209

As,0,-0.5999475877,0.,1.2259270798

**SI3-1** The details of MD simulations.

General parameters:

|                              |   |                      |
|------------------------------|---|----------------------|
| Max. points for each Traj.   | = | 4000                 |
| Total Number of Trajectories | = | 1                    |
| Random Number Generator Seed | = | 398465               |
| Trajectory Step Size         | = | 0.500 sqrt(amu)*bohr |

Sampling parameters:

|                              |   |                                      |
|------------------------------|---|--------------------------------------|
| Vib Energy Sampling Option   | = | Thermal sampling                     |
| TS Sampling direction        | = | Forward                              |
| Vib Sampling Temperature     | = | 373.0 K                              |
| Rot Energy Sampling Option   | = | Thermal distribution (symmetric top) |
| Rot Sampling Temperature     | = | 373.0 K                              |
| Start point scaling criteria | = | 1.000D-05 Hartree                    |

Integration parameters:

|                            |   |                            |
|----------------------------|---|----------------------------|
| Correction Scheme          | = | Fifth order polynomial fit |
| Project trans/rot in grad. | = | True                       |
| Project in prediction step | = | True                       |
| Project in correction step | = | True                       |
| Integration Scheme         | = | Bulirsch-Stoer method      |
| Integration Step Size      | = | 2.000D-01 femtosec         |
| Truncation Error Criteria  | = | 1.000D-08 bohr             |
| Energy Error Criteria      | = | 1.000D-04 Hartree          |
| Hessian evaluation         | = | Full Hessian always        |

**SI3-2** Potential energy of three designed pptNs of the  $\text{NXAl}_3^+$  ( $\text{X}=\text{N}, \text{P}, \text{As}$ ). (a)  $\text{N}_2\text{Al}_3^+$ , (b)  $\text{NPAI}_3^+$ , and (c)  $\text{NAsAl}_3^+$  along the MD trajectory at B3LYP/6-31G(d) level, respectively. Born-Oppenheimer molecular dynamics simulation is performed for 14ps at 373K. Potential energy (in au) versus time (in ps).

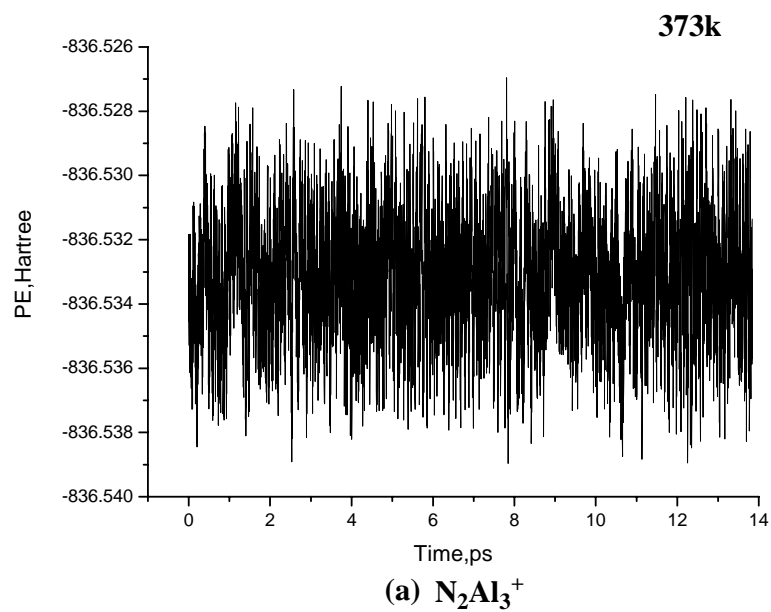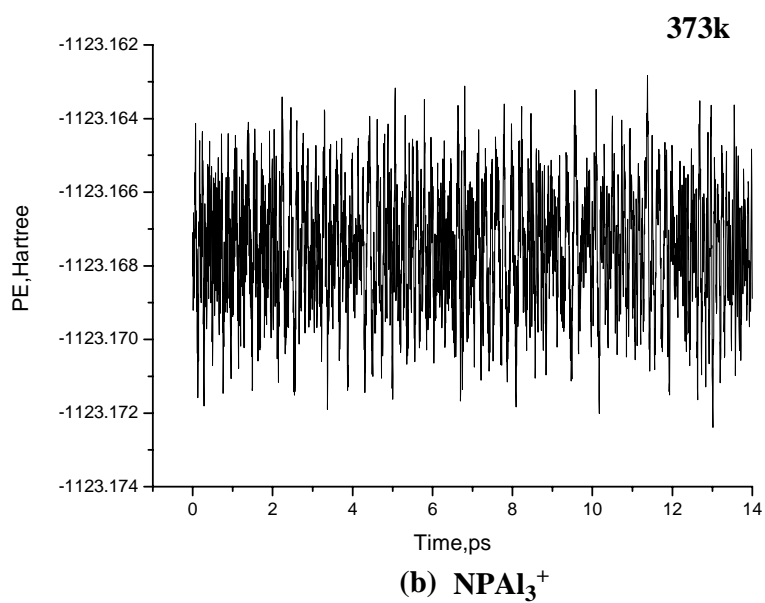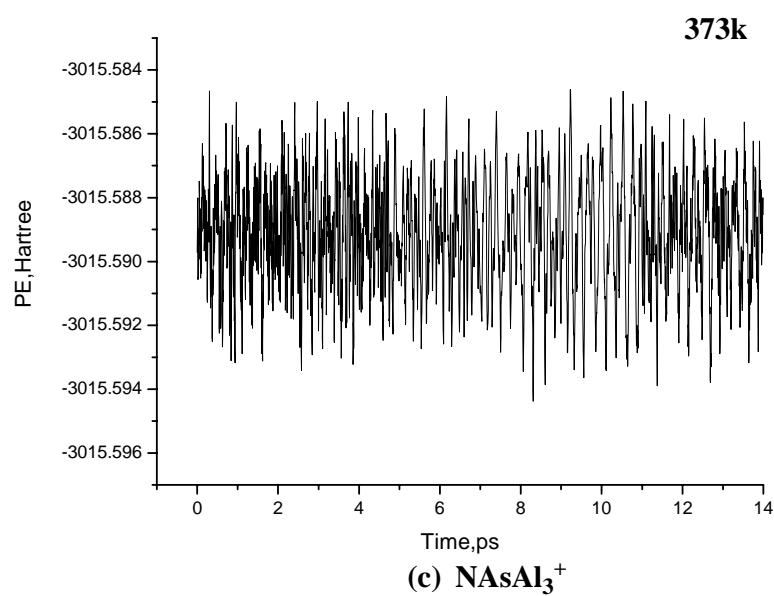

Supplement: c0cp02475a.pdf [file c0cp02475a.pdf]
